# Supplementary material for: Lithium bis(trifluoromethanesulfonyl)imide assisted dual-functional separator coating materials based on covalent organic frameworks for high-performance lithium–selenium sulfide batteries
Source: Royal Society of Chemistry journal article supplement (doi:10.1039/c9ta04614c), 2019-01-01
Supplement: c9ta04614c1.pdf [file c9ta04614c1.pdf]

## Supporting Information

### **Lithium bis(trifluoromethanesulfonyl)imide Assisted Dual-Functional Separator Coating Materials Based on Covalent Organic Framework for High-Performance Lithium-Selenium Sulfide Battery**

Yan Yang<sup>†a</sup>, Xu-Jia Hong<sup>†a</sup>, Chun-Lei Song<sup>a</sup>, Guo-Hui Li<sup>a</sup>, Yi-Xin Zheng<sup>a</sup>, Dan-Dan Zhou<sup>a</sup>, Min Zhang<sup>b</sup>, Yue-Peng Cai<sup>\*a</sup> and Hongxia Wang<sup>\*c</sup>

<sup>a</sup>*School of Chemistry and Environment, Guangzhou Key Laboratory of Materials for Energy Conversion and Storage, Guangdong Provincial Engineering Technology Research Center for Materials for Energy Conversion and Storage, South China Normal University Guangzhou, 510006, P. R. China*

<sup>b</sup>*School of Materials Science and Energy Engineering, Foshan University, Foshan, 528000, P. R. China.*

<sup>c</sup>*School of Chemistry, Physics and Mechanical Engineering, Queensland University of Technology(QUT), Brisbane, QLD 4001, Australia*

<sup>†</sup>*These authors have contributed equally.*

**Table S1.** Performance comparison of the Li-SeS<sub>2</sub> batteries.

| Electrode Materials                    | Separator           | The mass fraction of SeS <sub>2</sub> (wt%) | Areal SeS <sub>2</sub> mass loading (mg cm <sup>-2</sup> ) | Current Density (A/g) | Cycle number | Specific Capacity (mAh/g) | Specific Capacity (mAh/cm <sup>2</sup> ) | voltage range(V) | Refs.            |
|----------------------------------------|---------------------|---------------------------------------------|------------------------------------------------------------|-----------------------|--------------|---------------------------|------------------------------------------|------------------|------------------|
| CoS <sub>2</sub> @LRC/SeS <sub>2</sub> | Celgard             | 70                                          | 2.3-2.5                                                    | 0.5                   | 400          | 470                       | 1.08-1.18                                | 1.8-2.8          | 1                |
| CMK-3/SeS <sub>2</sub> @PDA            | Celgard             | 70                                          | 2.6-3.0                                                    | 2                     | 500          | 350                       | 0.91-1.05                                | 1.6-2.8          | 2                |
| Co-N-C/SeS <sub>2</sub>                | Celgard             | 66.5                                        | 3.2                                                        | 0.27                  | 200          | 970.2                     | 3.10                                     | 0.8-3.0          | 3                |
| SeS <sub>2</sub> /DLHC                 | -                   | 75                                          | 0.8-1.0                                                    | 0.2                   | 100          | ~910                      | ~0.73-0.91                               | 1.0-3.0          | 4                |
| SeS <sub>2</sub> /HMCNCs               | -                   | 78.1                                        | 1.2-1.5                                                    | 0.2                   | 100          | 812.6                     | 0.98-1.22                                | 1.0-3.0          | 5                |
| HMC@TiN/SeS <sub>2</sub>               | Celgard             | 70                                          | 1.0                                                        | 0.22                  | 100          | 690                       | 0.69                                     | 1.8-2.8          | 6                |
| SeS <sub>2</sub> @MCA                  | Celgard             | 49.3                                        | 1.5-2.0                                                    | 0.2                   | 130          | 308                       | 0.31-0.42                                | 0.8-4.0          | 7                |
| S-SeS <sub>2</sub> -DIB@KB600          | Celgard             | <70                                         | <0.8                                                       | 1                     | 500          | ~600                      | <0.48                                    | 1.8-2.8          | 8                |
| pPAN/SeS <sub>2</sub>                  | Celgard             | 63                                          | 1.26                                                       | 4                     | 2000         | 633                       | 0.80                                     | 1.0-3.0          | 9                |
| <b>SeS<sub>2</sub>/super-P</b>         | <b>COFs/Celgard</b> | <b>80</b>                                   | <b>2.0</b>                                                 | <b>0.56</b>           | <b>200</b>   | <b>678.8</b>              | <b>1.357</b>                             | <b>1.7-2.7</b>   | <b>This work</b> |
| <b>SeS<sub>2</sub>/MWCNT</b>           | <b>COFs/Celgard</b> | <b>80</b>                                   | <b>4.0</b>                                                 | <b>1.12</b>           | <b>800</b>   | <b>416.3</b>              | <b>1.665</b>                             |                  |                  |

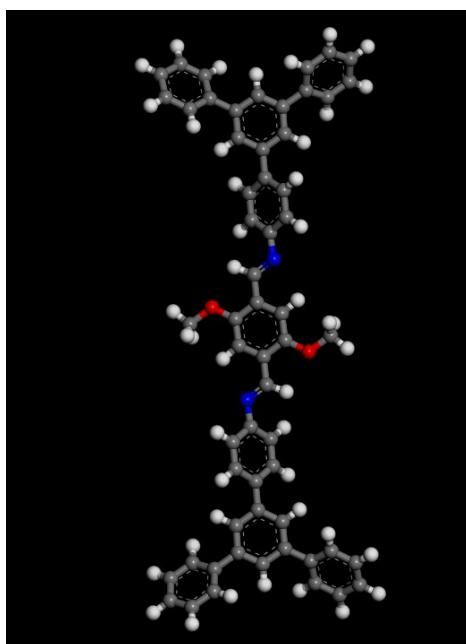

**Figure S1.** The segment of TPB-DMTP-COF for modelling its interaction with different species in the electrolyte

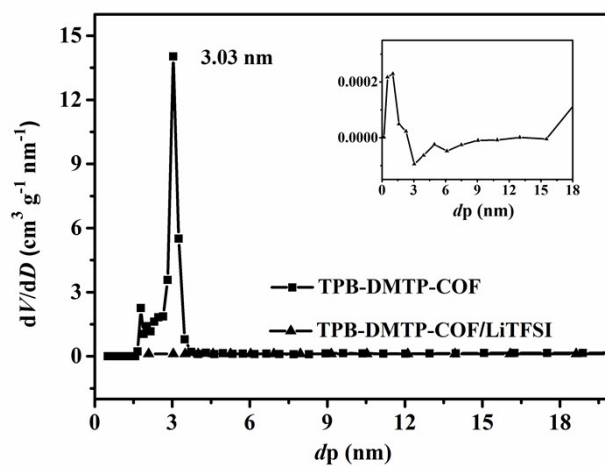

**Figure S2.** Pore size distribution of TPB-DMTP-COF and TPB-DMTP-COF/LiTFSI (The inset figure is the pore size distribution of TPB-DMTP-COF/LiTFSI).

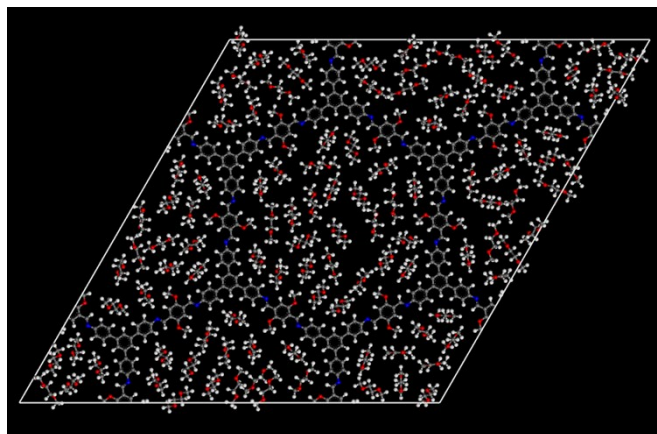

**Figure S3.** The DFT calculation of binding sites between TPB-DMTP-COF and DME.

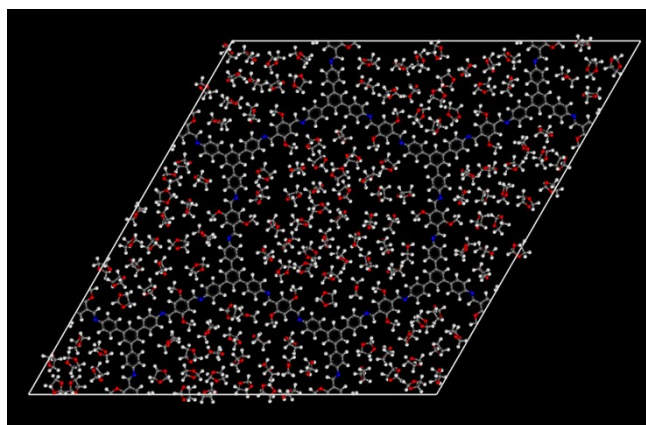

**Figure S4.** The DFT calculation of binding sites between TPB-DMTP-COF and DOL.

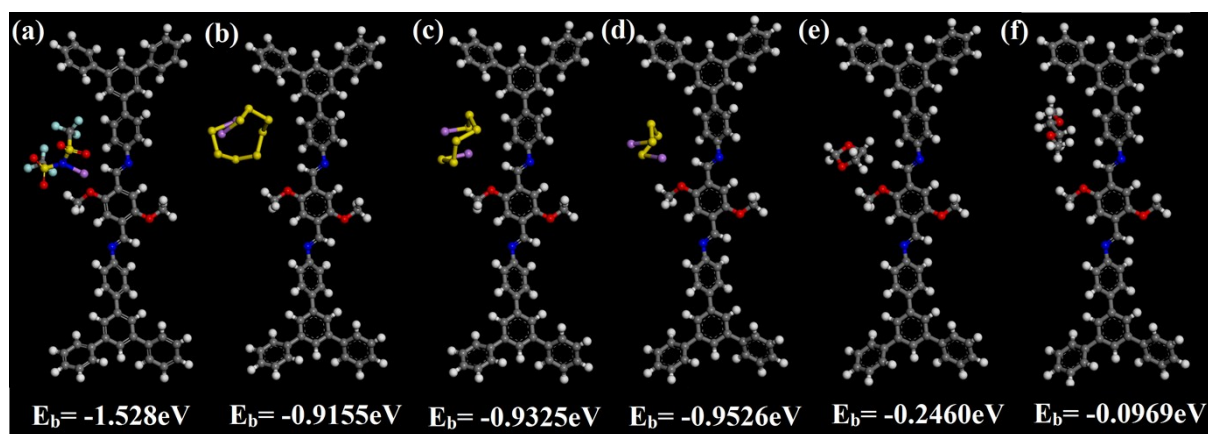

**Figure S5.** The interaction fragment between TPB-DMTP-COF and (a) LiTFSI, (b) Li<sub>2</sub>S<sub>8</sub>, (c) Li<sub>2</sub>S<sub>6</sub>, (d) Li<sub>2</sub>S<sub>4</sub>, (e) DOL, (f) DME and their binding energy.

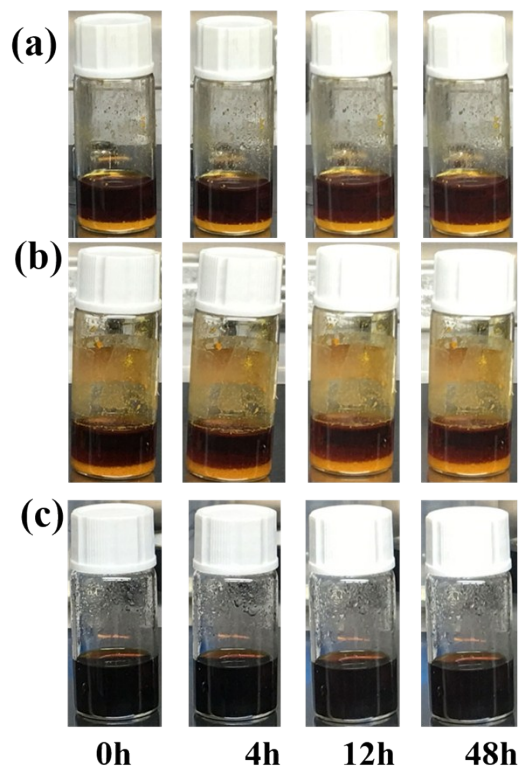

**Figure S6.** The photograph of the (a)  $\text{Li}_2\text{S}_6$ , (b)  $\text{Li}_2\text{S}_6/\text{LiFIS}$  solution after contacting with TPB-DMTP-COF. (c) The photograph of the  $\text{Li}_2\text{S}_6$  solution after contacting with super-P.

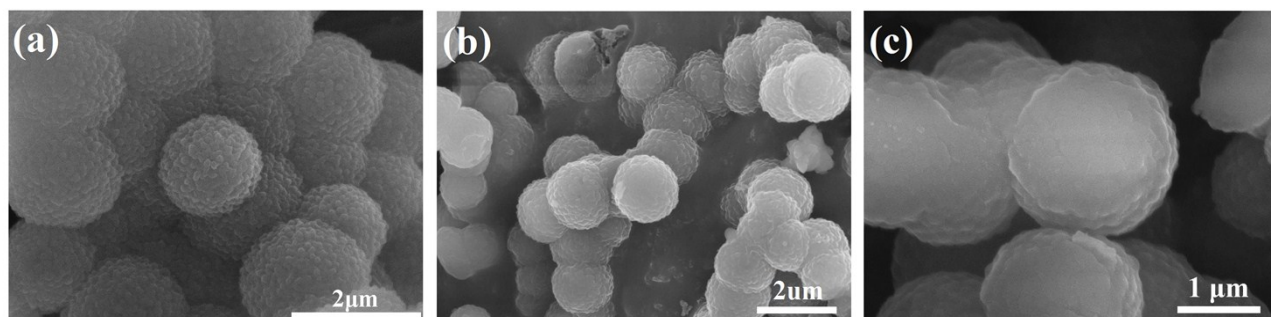

**Figure S7.** SEM of (a) TPB-DMTP-COF, (b) TPB-DMTP-COF/LiFIS, (c) TPB-DMTP-COF/ $\text{Li}_2\text{S}_6$ .

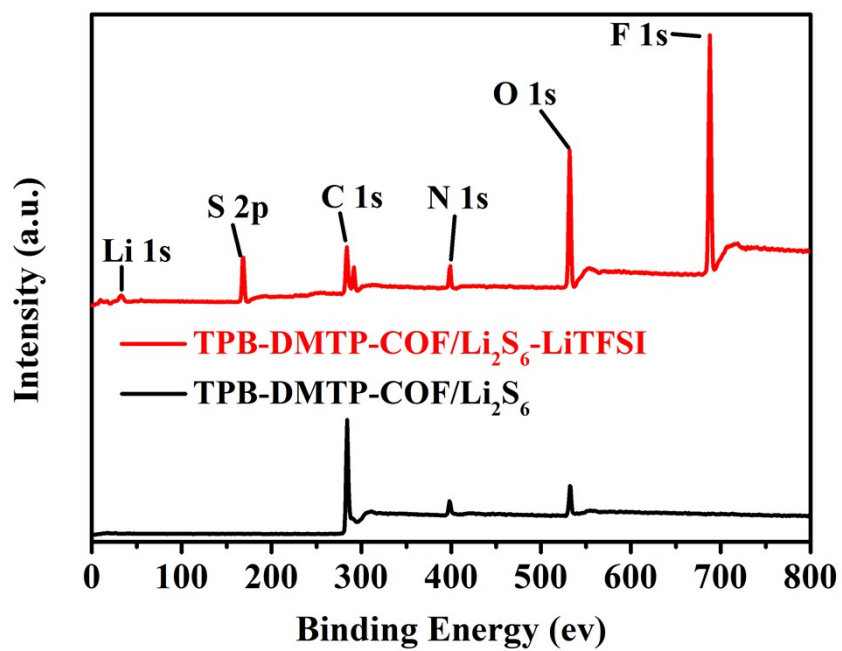

**Figure S8.** The XPS spectrum of COF after immersing in Li<sub>2</sub>S<sub>6</sub> solution and Li<sub>2</sub>S<sub>6</sub>-LiTFSI solution.

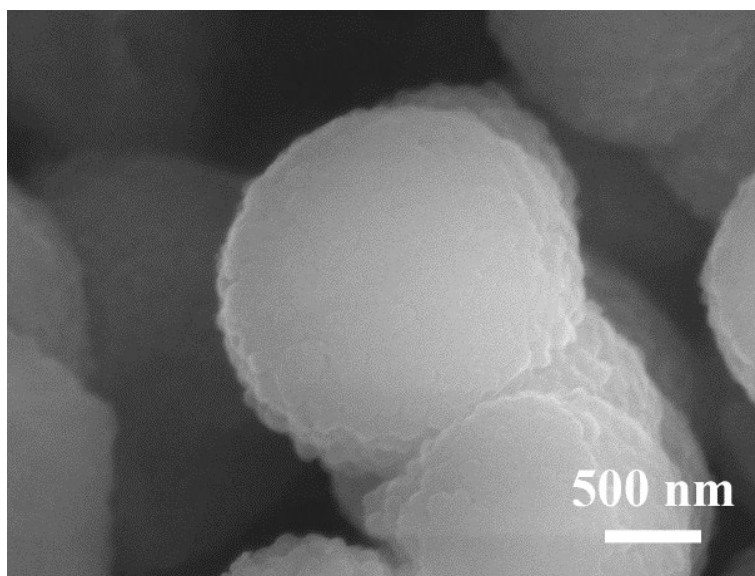

**Figure S9.** SEM of recovered TPB-DMTP-COF/LiTFSI.



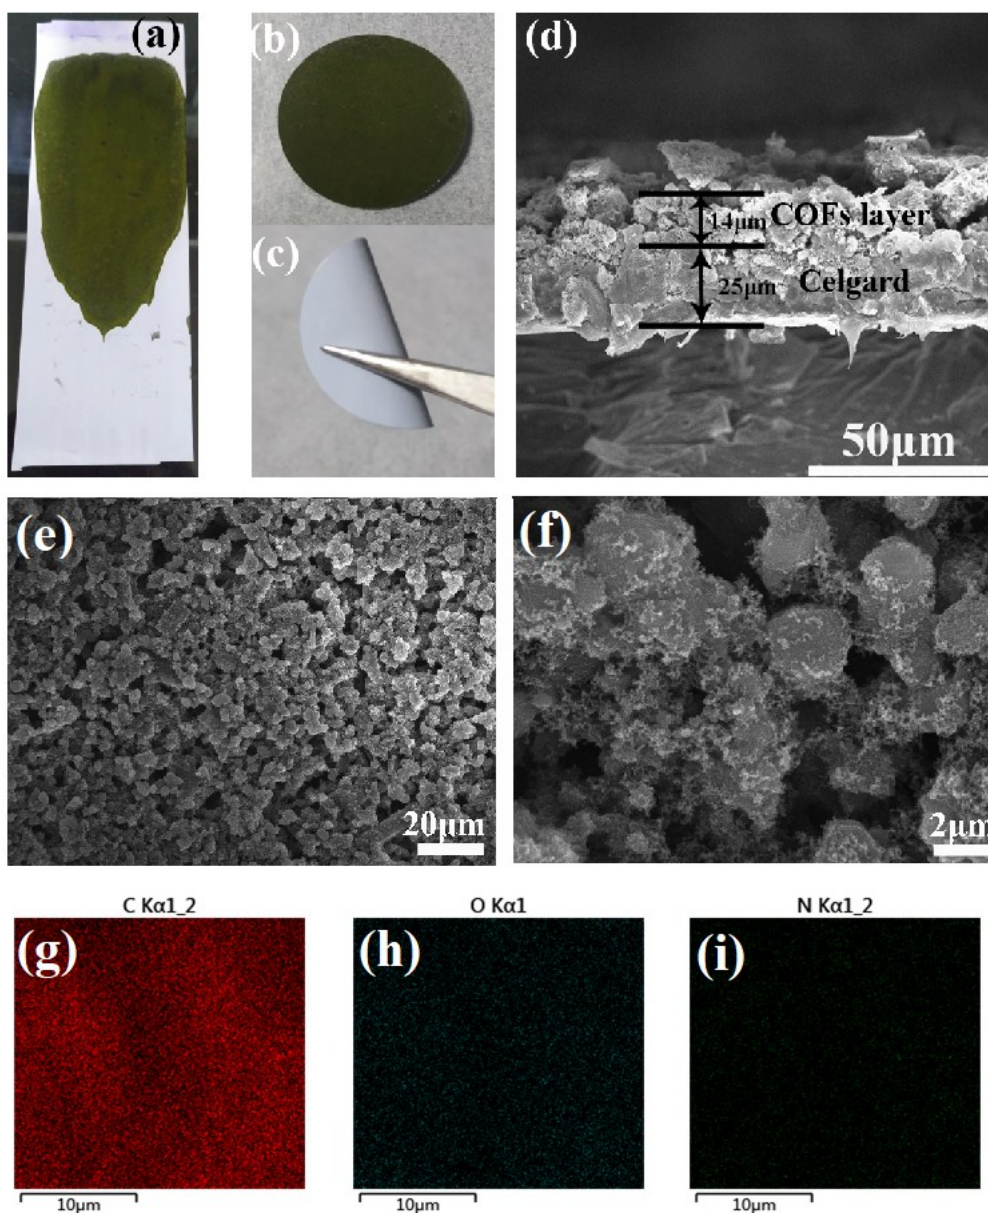

**Figure S10.** Digitabl images of the TPB-DMTP-COF coated Celgard separator (a, b, c). SEM images of the cross-sectional (d) and top surface (e, f) morphology of the TPB-DMTP-COF coated separator. (g-i) EDS mapping of the TPB-DMTP-COF coated Celgard separator.

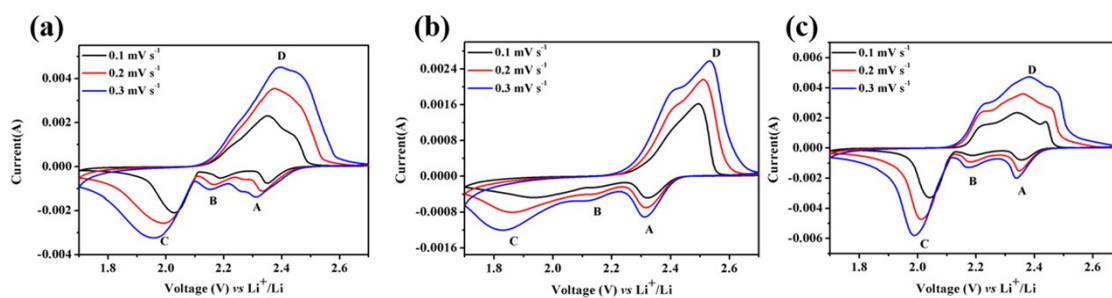

**Figure S11.** CV curves Li–SeS<sub>2</sub> cells with (a) super-P coating, (b) Celgard and (c) TPB-DMTP-COF coating at the scan rates of 0.1, 0.2 and 0.3 mV s<sup>-1</sup>, respectively.

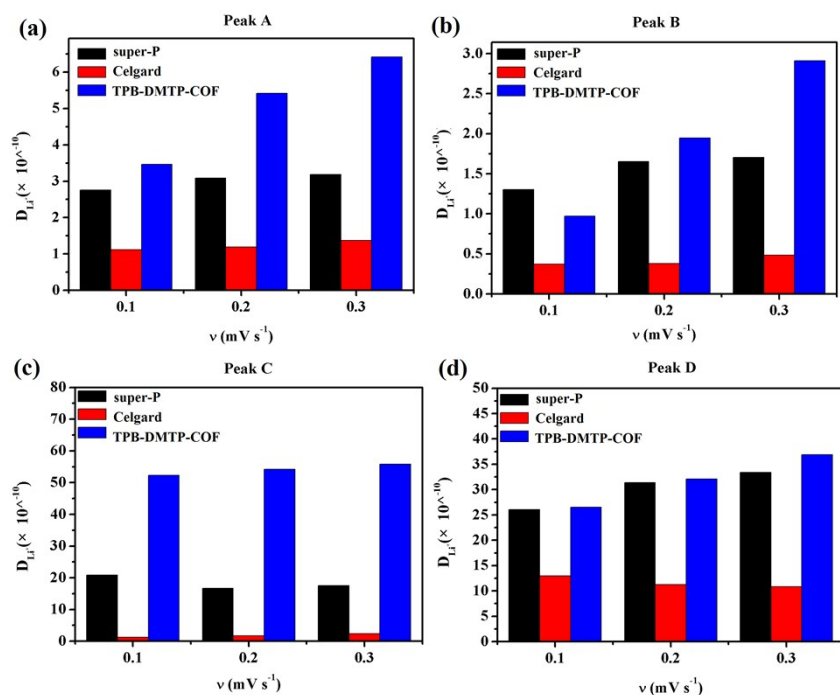

**Figure S12.** Comparison of lithium ion diffusion coefficient of the cells with different separator coating at different scan rates based on the peaks in CV plot with peak A (a) and peak B (b) (refers to  $SeS_2 \rightarrow Li_2S_n$  and  $Li_2Se_n$ ), peak C (c) (refers to  $Li_2S_n$  and  $Li_2Se_n \rightarrow Li_2S$  and  $Li_2Se$ ), and peak D (d) ( $Li_2S$  and  $Li_2Se \rightarrow SeS_2$ ).

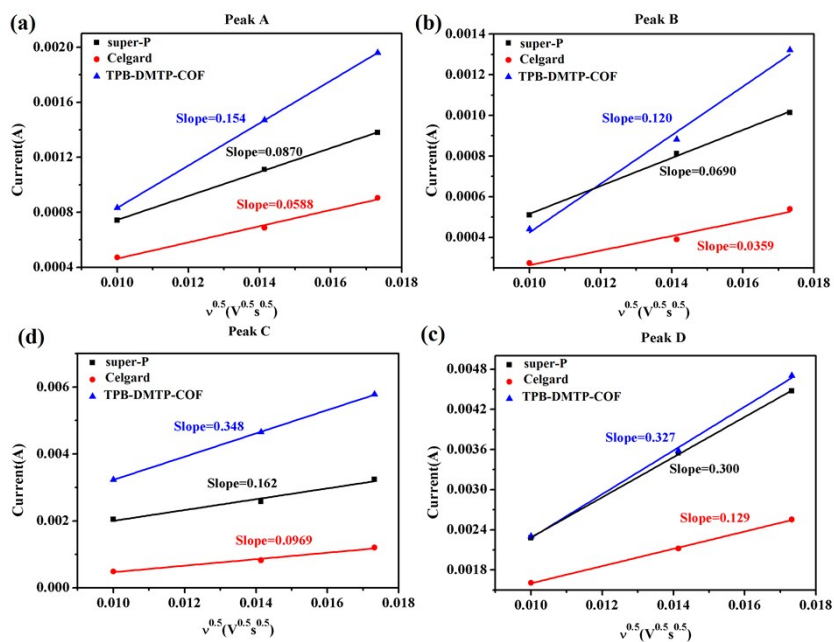

**Figure S13.** Plots of CV peak currents vs scan rate, (a) and (b) corresponds to the conversion of selenium disulfide to  $Li_2S_n$  and  $Li_2Se_n$ , respectively. (c) corresponds to the conversion of  $Li_2S_n$  and  $Li_2Se_n$  to  $Li_2S$  and  $Li_2Se$ . (d) corresponds to the conversion of  $Li_2S$  and  $Li_2Se$  to  $SeS_2$ .



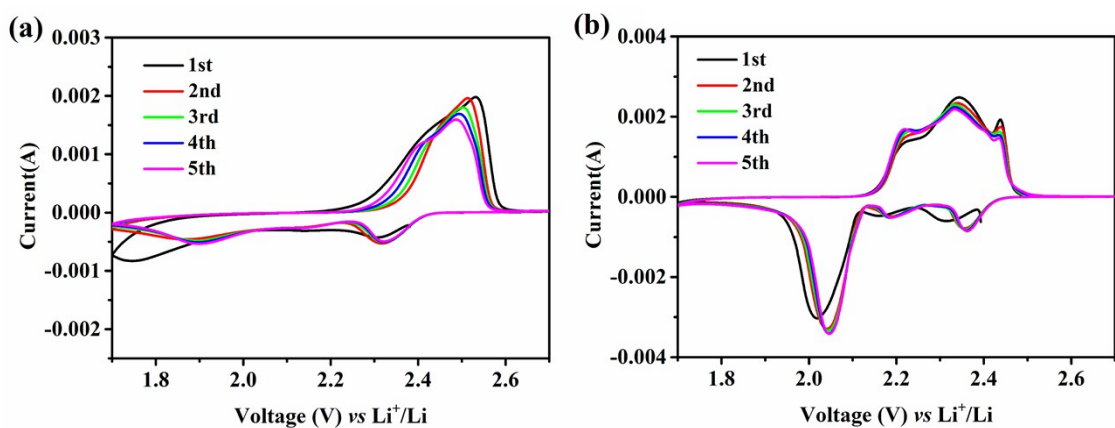

**Figure S14.** CV curves of the cell with (a) Celgard and super-P coated separator.

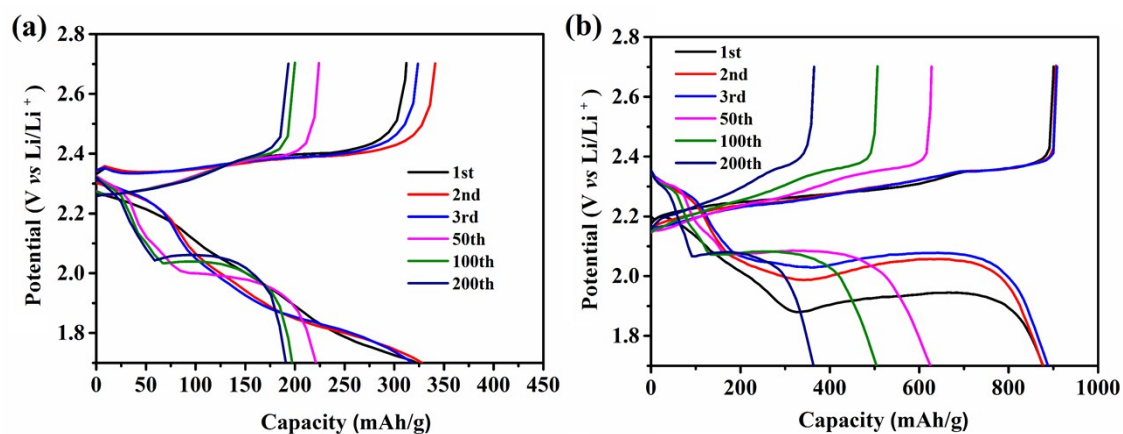

**Figure S15.** Galvanostatic discharge and charge profiles of the cell with (a) Celgard and (b) super-P coated separator at 0.5 C.

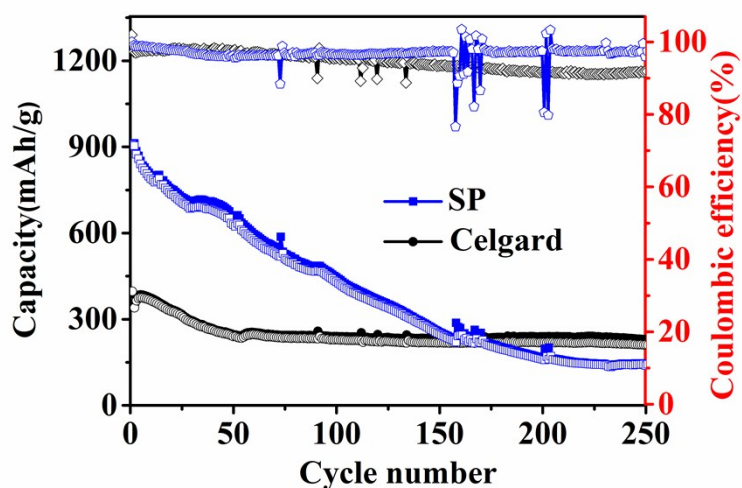

**Figure S16.** The cycling performance of Li-SeS<sub>2</sub> cell with Celgard or SP coated Celgard at 1 C (The SeS<sub>2</sub> loading is 4 mg/cm<sup>2</sup>).

## Reference

1. J. Zhang, Z. Li, X.W. Lou, *Angew. Chem.Int. Ed.* 2017, **56**, 14107-14112.
2. Z. Li, J. Zhang, H.B. Wu, X.W. Lou, *Adv. Energy Mater.* 2017, **7**, 1700281.

3. J. He, W. Lv, Y. Chen, J. Xiong, K. Wen, C. Xu, W. Zhang, Y. Li, W. Qin, W. He, *J.Mater.Chem.A* 2018, **6**, 10466-10473.
4. H. Zhang, L. Zhou, X. Huang, H. Song, C. Yu, *Nano Res.* **2016**, 9, 3725-3734.
5. C. Liu, X. Huang, J. Wang, H. Song, Y. Yang, Y. Liu, J. Li, L. Wang, C. Yu, *Adv. Funct. Mater.* 2018, **28**, 1705253.
6. Z. Li, J. Zhang, B.Y. Guan, X.W. Lou, *Angew. Chem. Int. Ed.* 2017, **56**, 16003-16007.
7. Z. Zhang, S. Jiang, Y. Lai, J. Li, J. Song, J. Li, *J. Power Sources* 2015, **284**, 95-102.
8. P. Dong, K.S. Han, J.-I. Lee, X. Zhang, Y. Cha, M.-K. Song, *ACS Appl. Mater. Inter.* 2018, **10**, 29565-29573.
9. Z. Li, J. Zhang, Y. Lu, X.W. Lou, *Sci. Adv.* 2018, **4**, 1682-1687.
